# Supplementary material for: A maximum likelihood framework for protein design
Source: PubMed Central journal article supplement (PMC1570151; doi:10.1186/1471-2105-7-326), 2006-06-29
Supplement: 1471-2105-7-326-S5.pdf [file 1471-2105-7-326-S5.pdf]

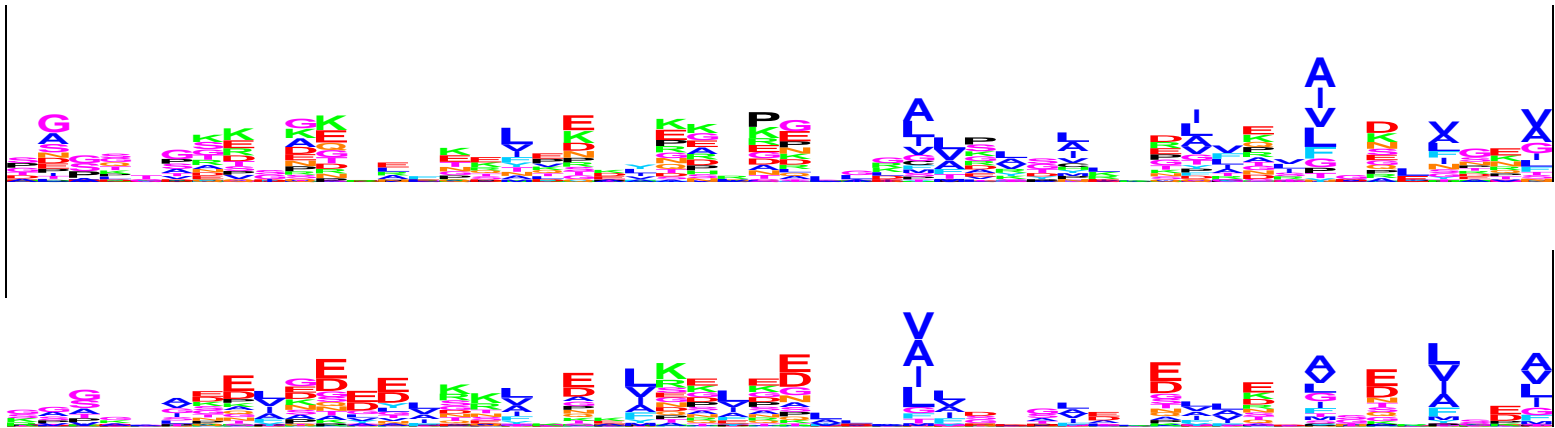

ALSDRLELVSASE | RKLFD | AAGMKDV | SLG | GEPDFDTPQH | KEYAKEA

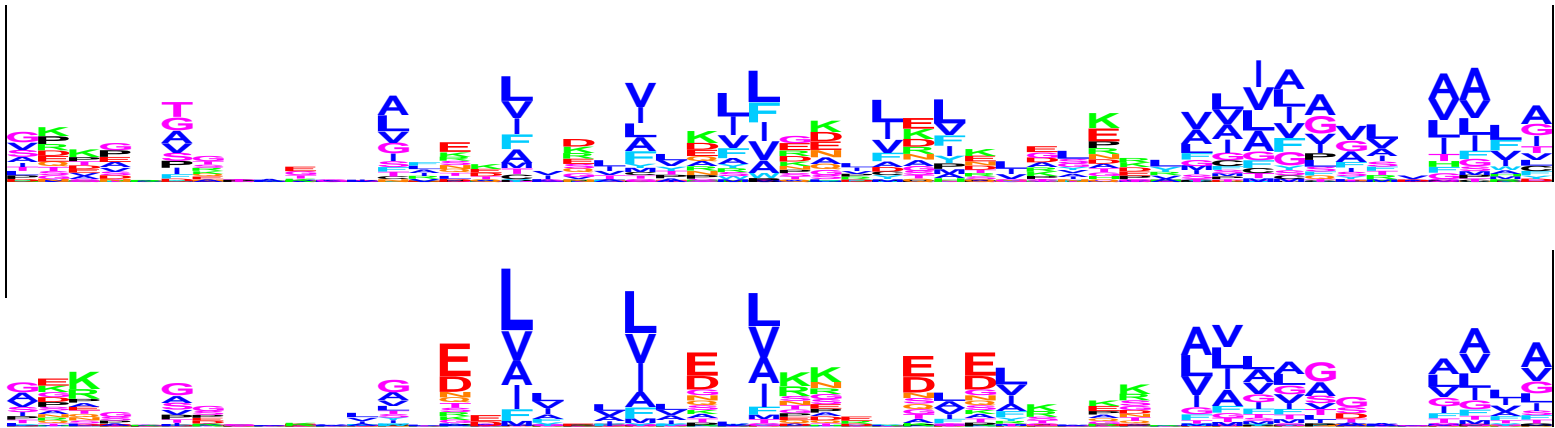

LDKGLTHYGN | GLLLELREA | AEKLLKKQNG | EADPKTE | MVLGANQAFLL

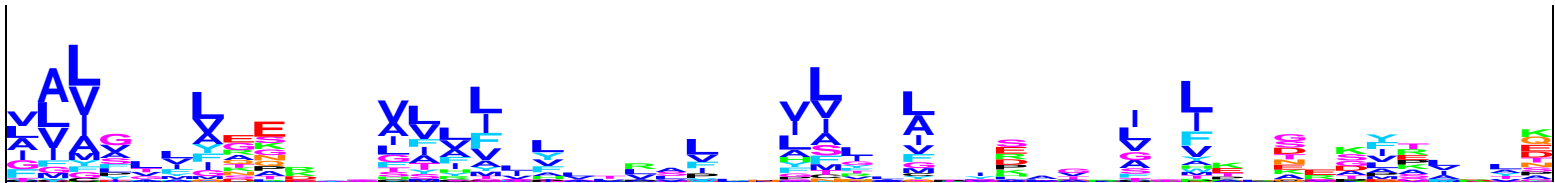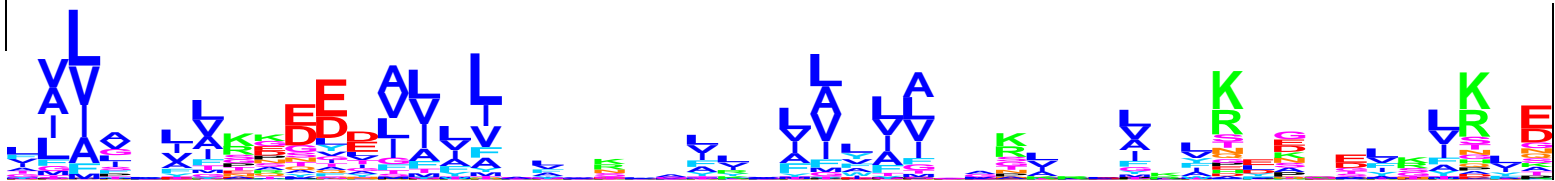

MGLSAFLKDGEEVL | PTPAFVSYAPAV | LAGGKPVVEVPTYEEDEFRLNVD

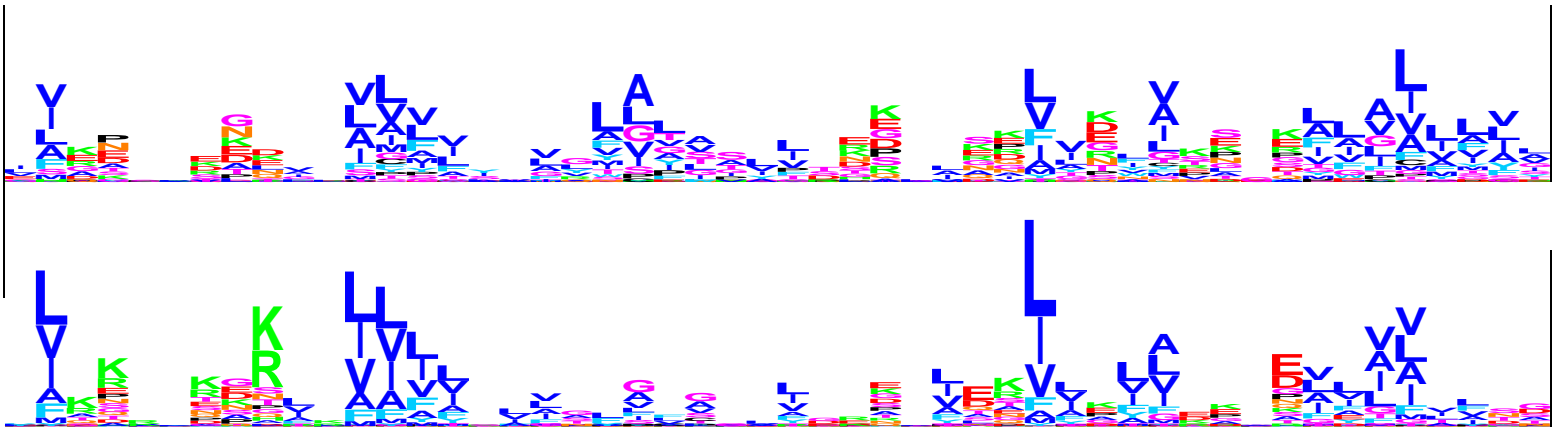

ELKKYVTDKTRAL | | NSPCNP TGAVLTKKDL EE | AD FVVEHDL | V | SDEV

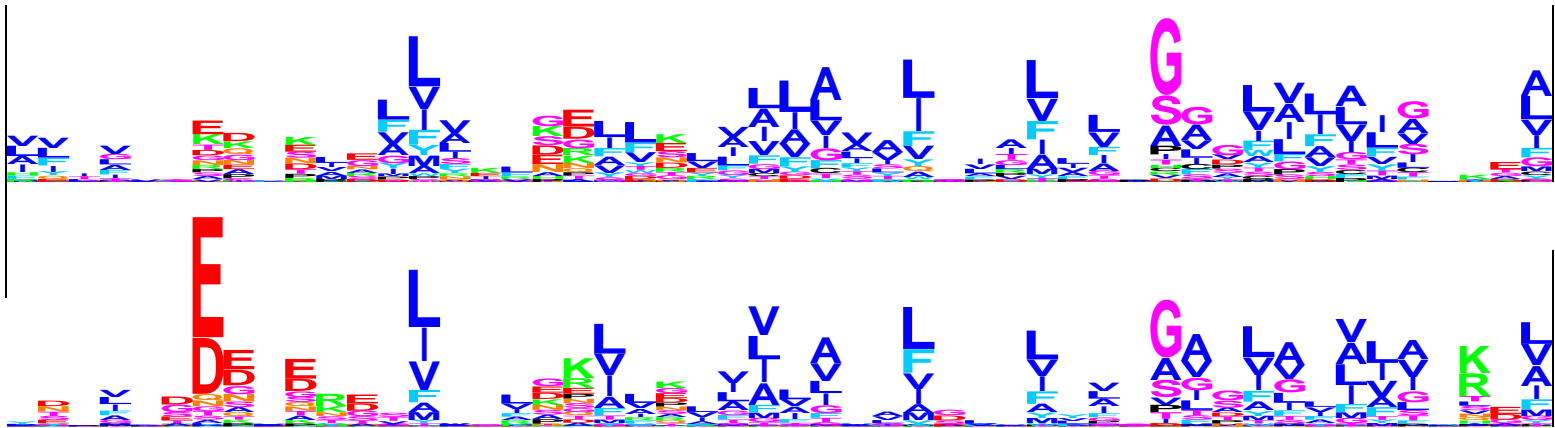

YEHF | YDDARHYS | ASLDGMFERT | TVNGFSKTFAMTGWRLGFVAAPSW |



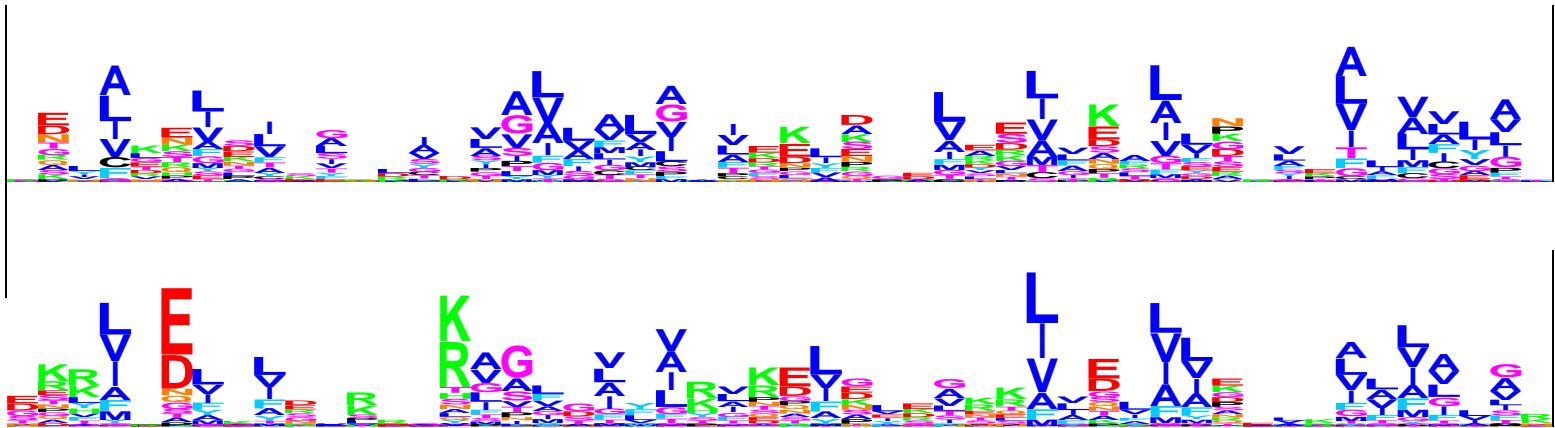

WKRLNEMGLPTVKPKGAFY|FPR|RDTGLTSKKFSEMLKEARVAVVPGS

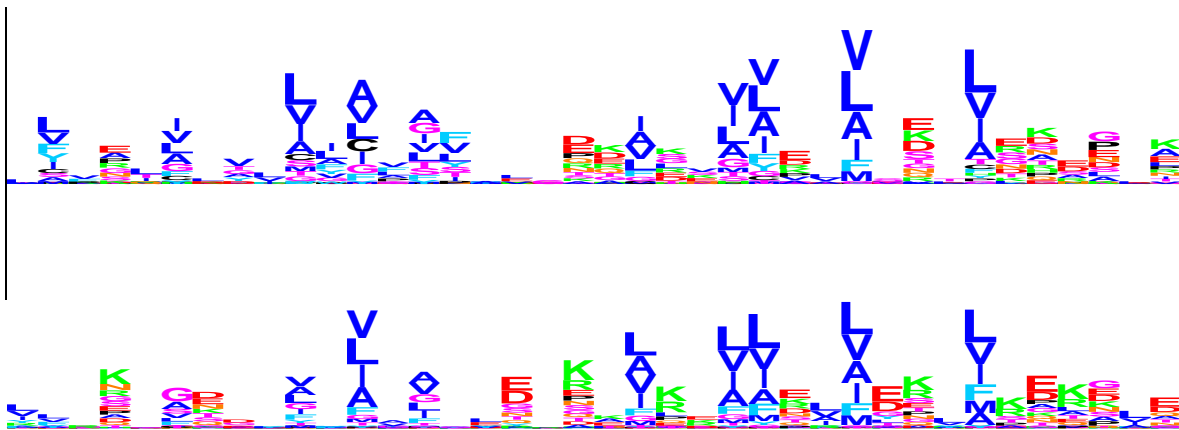

AFGKAGEGYVR | SYATAYEKLFEAMDRMERVLKERKLV
