# Supplementary material for: A maximum likelihood framework for protein design
Source: PubMed Central journal article supplement (PMC1570151; doi:10.1186/1471-2105-7-326), 2006-06-29
Supplement: 1471-2105-7-326-S6.pdf [file 1471-2105-7-326-S6.pdf]



ALSDRLELVSASE|RKLFDAAGMKDV|SLG|GEPDFDTPQH|KEYAKEA

LDKGLTHYGN|GLELREA|AEKLLKQNG|EADPKTE|MVLGANQAFLL

A F A L L N P G D E V L I P P Y W Y Y L A G G P V Y T E N G F L P P E  
M G L S A F L K D G E E V L I P T P A F V S Y A P A V I L A G G K P V E V P T Y E E D E F R L N V D



Y  
E L Y D G K H S I A L P G M P R T I T I N G S K Y A M T G W R L G Y A A G P L  
Y E H F | Y D D A R H Y S | A S L D G M F E R T | T V N G F S K T F A M T G W R L G F V A A P S W |

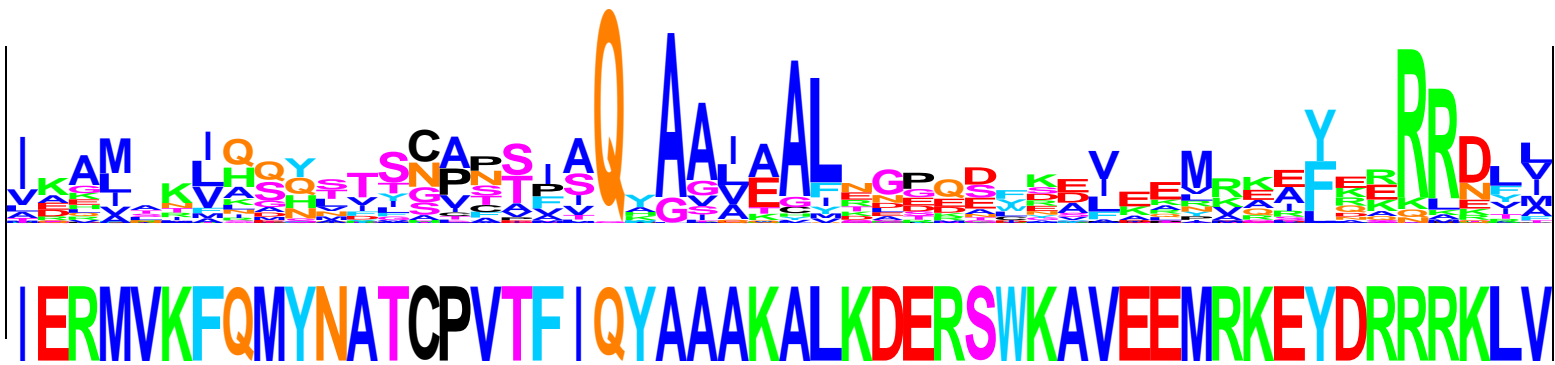

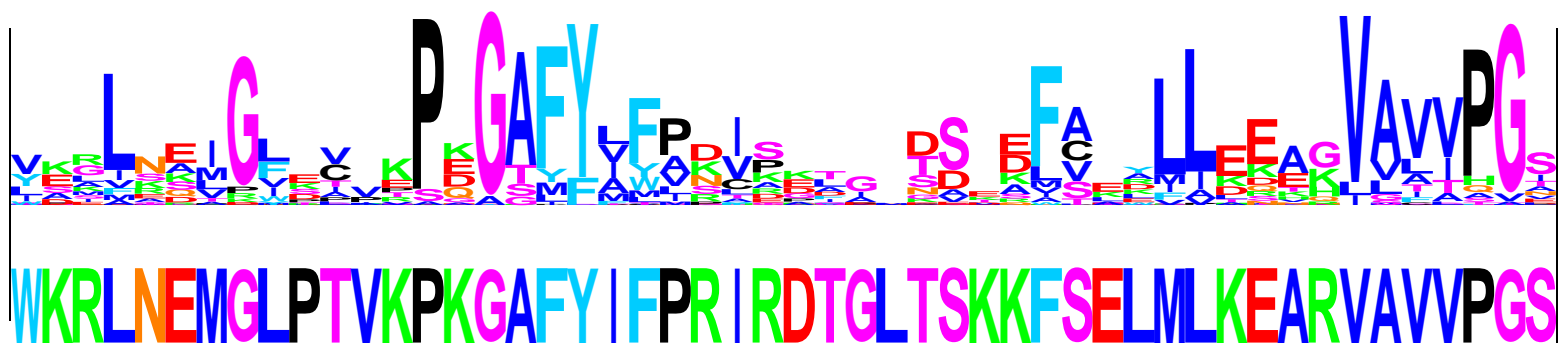

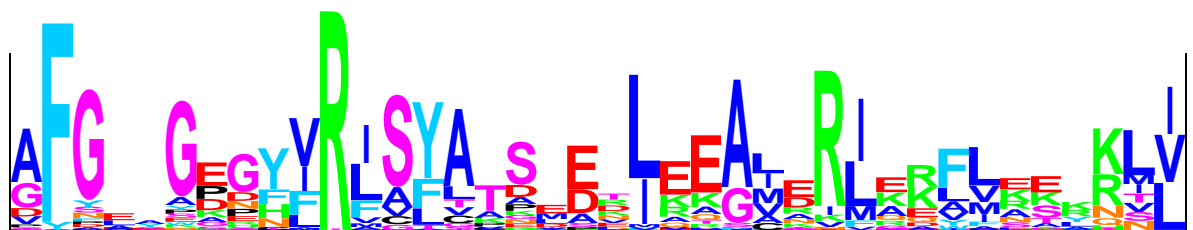

AFGKAGEGYVR | SYATAYEKL E EAMDRM E R V L K E R K L V
