# Supplementary material for: A maximum likelihood framework for protein design
Source: PubMed Central journal article supplement (PMC1570151; doi:10.1186/1471-2105-7-326), 2006-06-29
Supplement: 1471-2105-7-326-S8.pdf [file 1471-2105-7-326-S8.pdf]

| <b>PDB id</b> | <b>Average Z-score ratio</b> | <b>Ranking (median)</b> | <b>Target fold in top 1%</b> | <b>Target fold in top 10%</b> | <b>Average entropy/site</b> | <b>Average seq. Similarity</b> | <b>Average seq. Identity</b> |
|---------------|------------------------------|-------------------------|------------------------------|-------------------------------|-----------------------------|--------------------------------|------------------------------|
| 1EB6A         | 0.8531                       | 1                       | 90%                          | 95%                           | 0.842                       | 20.0                           | 6.86                         |
| 1TIYA         | 0.7978                       | 12.5                    | 75%                          | 100%                          | 0.766                       | 17.4                           | 6.61                         |
| 1B8XA         | 0.7588                       | 6.5                     | 70%                          | 100%                          | 0.745                       | 20.8                           | 7.35                         |
| 1VAVA         | 0.7143                       | 1                       | 90%                          | 100%                          | 0.742                       | 22.9                           | 7.91                         |
| 1LAY0         | 0.7503                       | 2.5                     | 90%                          | 100%                          | 0.805                       | 22.2                           | 8.69                         |
| 2SCUA         | 0.6885                       | 1                       | 90%                          | 100%                          | 0.838                       | 22.5                           | 8.37                         |
| 1D2TA         | 0.7174                       | 2                       | 90%                          | 100%                          | 0.932                       | 21.0                           | 7.66                         |
| 1Q4MA         | 0.5926                       | 2.5                     | 75%                          | 90%                           | 0.693                       | 22.0                           | 7.18                         |
| 1B5L0         | 0.7181                       | 2                       | 80%                          | 100%                          | 0.766                       | 25.4                           | 8.85                         |
| 1UMHA         | 0.5743                       | 50                      | 50%                          | 75%                           | 0.712                       | 21.0                           | 7.58                         |
| 1NNGA         | 0.6736                       | 2.5                     | 85%                          | 95%                           | 0.755                       | 22.7                           | 7.16                         |
| 1CE7A         | 0.6346                       | 11.5                    | 75%                          | 90%                           | 0.769                       | 21.4                           | 7.95                         |
| 2PTH0         | 0.6749                       | 6                       | 100%                         | 100%                          | 0.821                       | 21.1                           | 8.03                         |
| 1NAL3         | 0.6030                       | 2.5                     | 90%                          | 100%                          | 0.845                       | 24.4                           | 8.49                         |
| 1CTT0         | 0.6205                       | 1                       | 100%                         | 100%                          | 0.862                       | 23.2                           | 8.69                         |
| 1GS5A         | 0.5770                       | 1                       | 95%                          | 100%                          | 0.799                       | 25.0                           | 9.40                         |
| 1DQYA         | 0.6078                       | 5.5                     | 90%                          | 100%                          | 0.814                       | 21.1                           | 7.53                         |
| 1C8OA         | 0.5422                       | 8                       | 65%                          | 85%                           | 0.738                       | 24.1                           | 7.78                         |
| 1VI9A         | 0.5486                       | 2.5                     | 80%                          | 100%                          | 0.765                       | 21.8                           | 8.12                         |
| 1CFZA         | 0.5641                       | 8.5                     | 60%                          | 95%                           | 0.742                       | 26.6                           | 9.51                         |
| 1UOX0         | 0.5280                       | 5                       | 65%                          | 90%                           | 0.700                       | 21.4                           | 7.34                         |
| 1JJFA         | 0.5664                       | 6.5                     | 80%                          | 100%                          | 0.782                       | 21.6                           | 8.25                         |
| 1D2NA         | 0.5389                       | 5                       | 85%                          | 100%                          | 0.767                       | 26.2                           | 8.72                         |
| 1Q77A         | 0.5027                       | 6.5                     | 65%                          | 85%                           | 0.691                       | 25.5                           | 8.94                         |
| 3CLA0         | 0.5053                       | 15                      | 65%                          | 90%                           | 0.665                       | 21.9                           | 7.19                         |
| 5NULO         | 0.5286                       | 2                       | 75%                          | 100%                          | 0.787                       | 26.6                           | 8.22                         |
| 1CV80         | 0.5249                       | 14                      | 60%                          | 100%                          | 0.737                       | 22.2                           | 7.04                         |
| 1B9LA         | 0.5373                       | 48.5                    | 50%                          | 75%                           | 0.716                       | 22.3                           | 7.02                         |
| 1GHEA         | 0.5285                       | 71                      | 45%                          | 80%                           | 0.650                       | 21.4                           | 7.98                         |
| 1D4AA         | 0.4495                       | 78                      | 35%                          | 75%                           | 0.725                       | 21.8                           | 8.32                         |
| 1O70A         | 0.4782                       | 6                       | 75%                          | 95%                           | 0.743                       | 24.1                           | 7.64                         |
| 1MUN0         | 0.4379                       | 40.5                    | 50%                          | 75%                           | 0.762                       | 21.6                           | 7.47                         |
| 1RXQA         | 0.4393                       | 37                      | 55%                          | 80%                           | 0.725                       | 24.2                           | 8.25                         |
| 1RIFA         | 0.4916                       | 6                       | 95%                          | 95%                           | 0.725                       | 21.1                           | 6.68                         |
| 1D2ZB         | 0.4398                       | 66.5                    | 30%                          | 85%                           | 0.777                       | 23.3                           | 7.67                         |
| 1HUW0         | 0.4336                       | 98                      | 35%                          | 80%                           | 0.734                       | 23.4                           | 7.14                         |
| 3SDHA         | 0.3600                       | 113.5                   | 40%                          | 75%                           | 0.709                       | 25.6                           | 8.69                         |
| 1H31A         | 0.4460                       | 335                     | 10%                          | 55%                           | 0.698                       | 20.3                           | 7.12                         |
| 1EFDN         | 0.3922                       | 11                      | 70%                          | 100%                          | 0.712                       | 22.5                           | 7.54                         |
| 1JJVA         | 0.3638                       | 28.5                    | 55%                          | 70%                           | 0.681                       | 23.7                           | 7.76                         |
| 1RU8A         | 0.3374                       | 178.5                   | 10%                          | 70%                           | 0.678                       | 23.0                           | 8.54                         |
| 1B74A         | 0.2983                       | 89                      | 50%                          | 53%                           | 0.801                       | 26.0                           | 9.35                         |
| 1PA7A         | 0.3455                       | 147                     | 21%                          | 58%                           | 0.704                       | 22.3                           | 7.28                         |
| 1EF8A         | 0.3580                       | 95.5                    | 30%                          | 85%                           | 0.778                       | 22.6                           | 7.87                         |
| 1PQ4A         | 0.3762                       | 54                      | 40%                          | 85%                           | 0.756                       | 24.7                           | 7.88                         |
| 1ETB1         | 0.3255                       | 274                     | 30%                          | 55%                           | 0.702                       | 21.0                           | 8.69                         |
| 1ETEA         | 0.4506                       | 405                     | 40%                          | 50%                           | 0.717                       | 23.1                           | 7.31                         |
| 3DFR0         | 0.3466                       | 129                     | 32%                          | 74%                           | 0.662                       | 21.8                           | 7.41                         |

|              |               |              |              |              |              |             |             |
|--------------|---------------|--------------|--------------|--------------|--------------|-------------|-------------|
| 1UIZA        | 0.3600        | 176          | 30%          | 70%          | 0.726        | 21.3        | 8.09        |
| 3TMKA        | 0.3458        | 121.5        | 29%          | 79%          | 0.683        | 20.6        | 6.69        |
| 1AUVA        | 0.3139        | 114.5        | 35%          | 70%          | 0.641        | 21.2        | 7.06        |
| 1GGGA        | 0.2697        | 299.5        | 25%          | 60%          | 0.693        | 22.2        | 7.89        |
| 1F45B        | 0.1965        | 736          | 16%          | 32%          | 0.687        | 21.6        | 6.64        |
| 2SAK0        | 0.1740        | 629.5        | 15%          | 40%          | 0.701        | 22.7        | 8.80        |
| 1R6FA        | 0.1509        | 346          | 15%          | 50%          | 0.733        | 27.1        | 8.68        |
| 1T35A        | 0.1739        | 1326         | 5%           | 26%          | 0.571        | 19.0        | 6.16        |
| 1KYQA        | -0.3307       | 1056         | 8%           | 28%          | 0.660        | 21.3        | 6.97        |
| 1D9CA        | 0.0005        | 1558         | 0%           | 15%          | 0.731        | 23.8        | 6.57        |
| 1QKRA        | 0.0127        | 1878         | 5%           | 15%          | 0.727        | 23.7        | 7.76        |
| 1SFXA        | -0.0508       | 2246         | 0%           | 5%           | 0.722        | 25.5        | 8.77        |
| <b>TOTAL</b> | <b>0.4526</b> | <b>32.75</b> | <b>53.6%</b> | <b>77.5%</b> | <b>0.738</b> | <b>22.7</b> | <b>7.82</b> |
